# Supplementary material
Source: Springer Nature journal article supplement (http://yannick.poulet.org/publications/2007-fire-ant-gene-expression-microarrays/13059_2006_1491_MOESM5_ESM.pdf)

## Additional Data File 5: Putative Hymenoptera-specific Genes

The 10,000 bp region around the ant-bee alignment of every putative Hymenoptera-specific gene is depicted relative to the annotated honey bee genome.

The honey bee genome assembly 2.0 chromosome coordinates are at the top of each image. Below, the alignment of proteins from *A. gambiae*, *C. elegans*, *D. melanogaster*, *H. sapiens* and *S. cerevisiae* are shown. Additionally, honey bee proteins predicted by several different groups (Eisen, EMBL, Ensembl, NCBI) as well as with multiple *ab initio* prediction methods are displayed. Finally, genes from the honey bee Official Gene Set (GLEAN3) are in red. The alignment of fire ant transcripts are in light blue; 5' to 3' direction is indicated by an arrow.

Coordinates may differ from those in Table 3 because Table 3 was generated using assembly 4 of the honey bee genome.

Index of subfigures:

|                                    | page |
|------------------------------------|------|
| a. SiJWA02BAZ2.scf                 | 2    |
| b. SiJWA03CAW.scf                  | 3    |
| c. SiJWA12ACK.scf                  | 4    |
| d. SiJWB12BCQ.tag5_B12_04.scf      | 5    |
| e. SiJWC11BAT.scf                  | 6    |
| f. SI.CL.8.cl.881.Contig1          | 7    |
| g. SI.CL.8.cl.843.SiJWH04BDO2.scf  | 8    |
| h. SI.CL.19.cl.1938.Contig1        | 9    |
| i. SI.CL.19.cl.1953.SiJWC11BBX.scf | 10   |
| j. SI.CL.23.cl.2326.Contig1        | 11   |
| k. SI.CL.26.cl.2688.Contig1        | 12   |
| l. SI.CL.33.cl.3311.Contig1        | 13   |
| m. SI.CL.33.cl.3384.Contig1        | 14   |
| n. SI.CL.35.cl.3595.Contig1        | 15   |
| o. SiJWE02BBO2.scf                 | 16   |
| p. SiJWF07BCC.tag5_F07_11.scf      | 17   |
| q. SiJWG01BDU2.scf                 | 18   |
| r. SiJWG03ACB.scf                  | 19   |
| s. SiJWH02AAN.scf                  | 20   |
| t. SiJWH05BDPR5A08.scf             | 21   |
| u. SiJWH05BDV2.scf                 | 22   |
| v. SiJWH08AAT.scf                  | 23   |
| w. SiJWH08ADY                      | 24   |

# a.SiJWA02BAZ2.scf

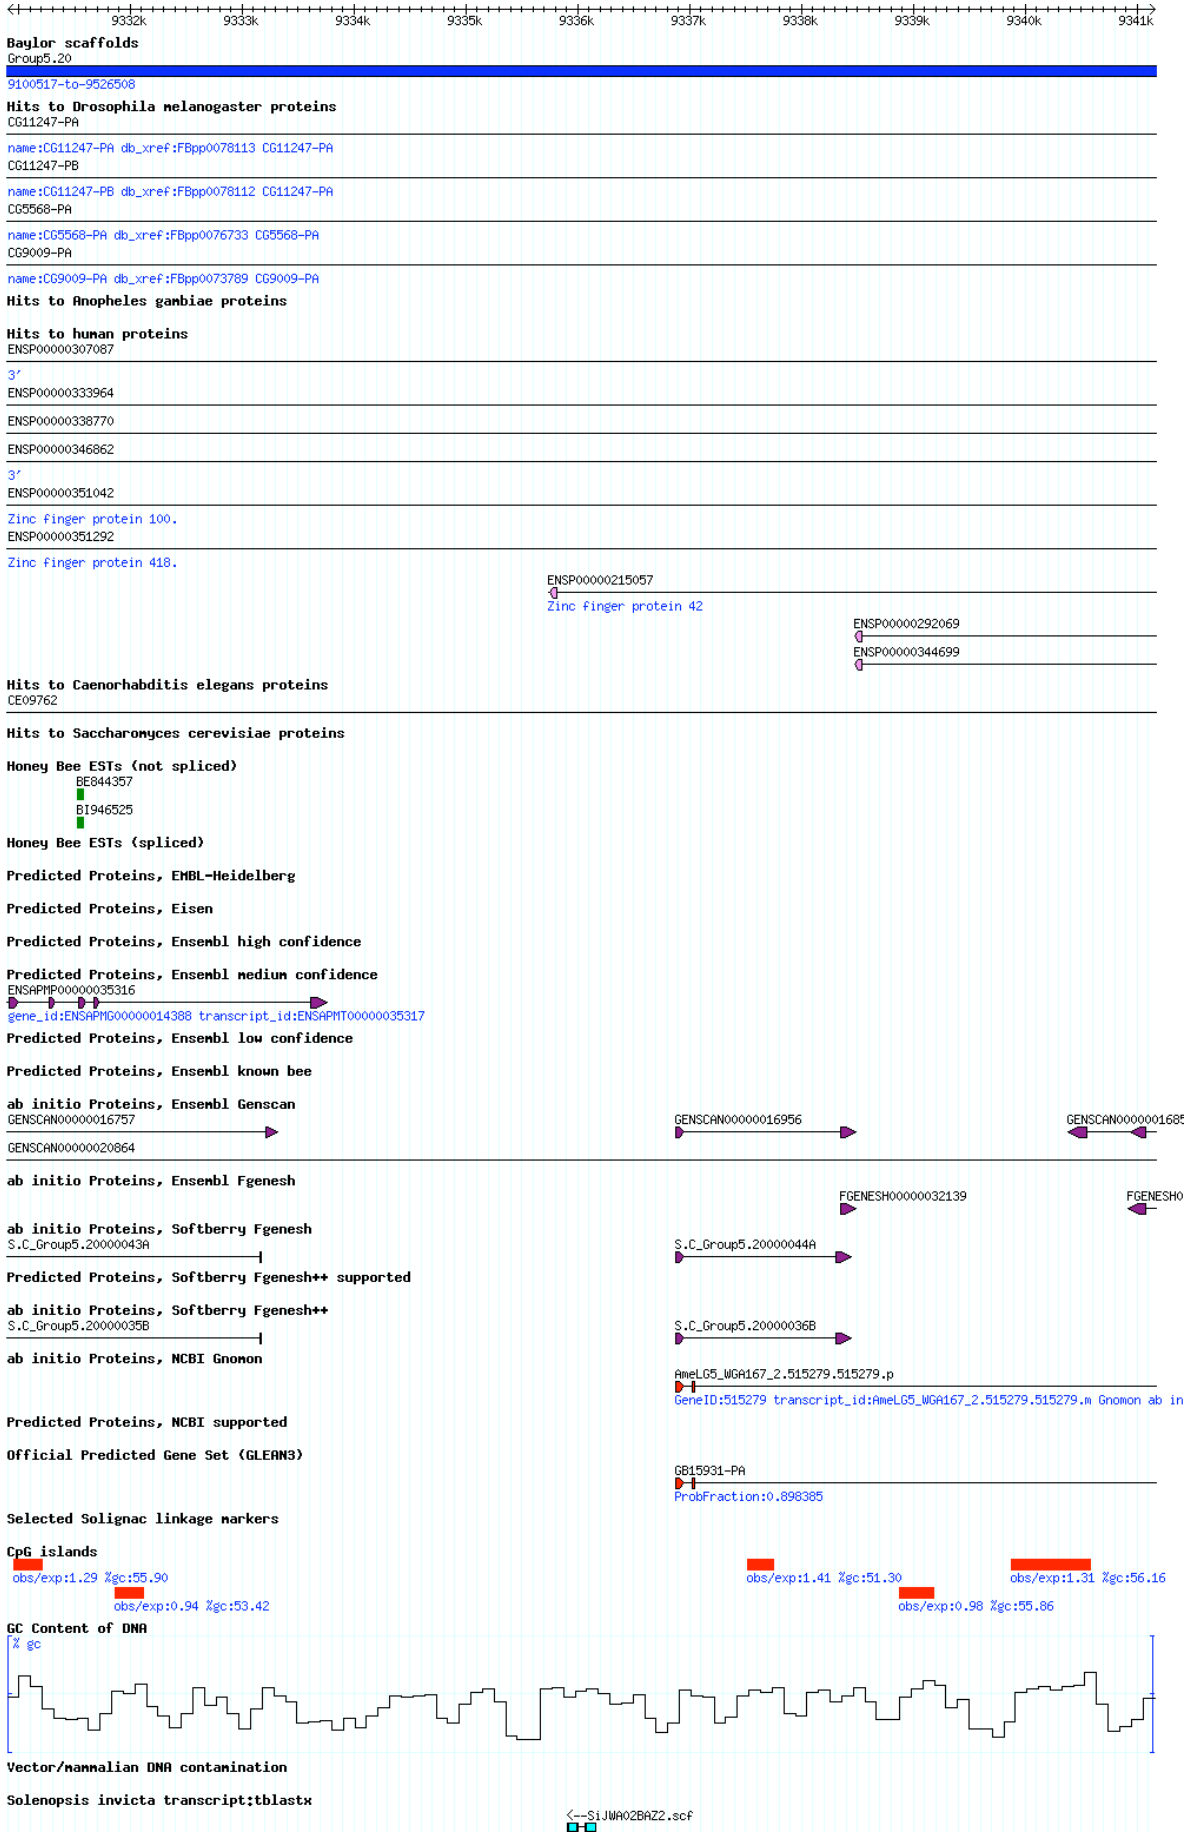

# b.SiJWA03CAW.scf

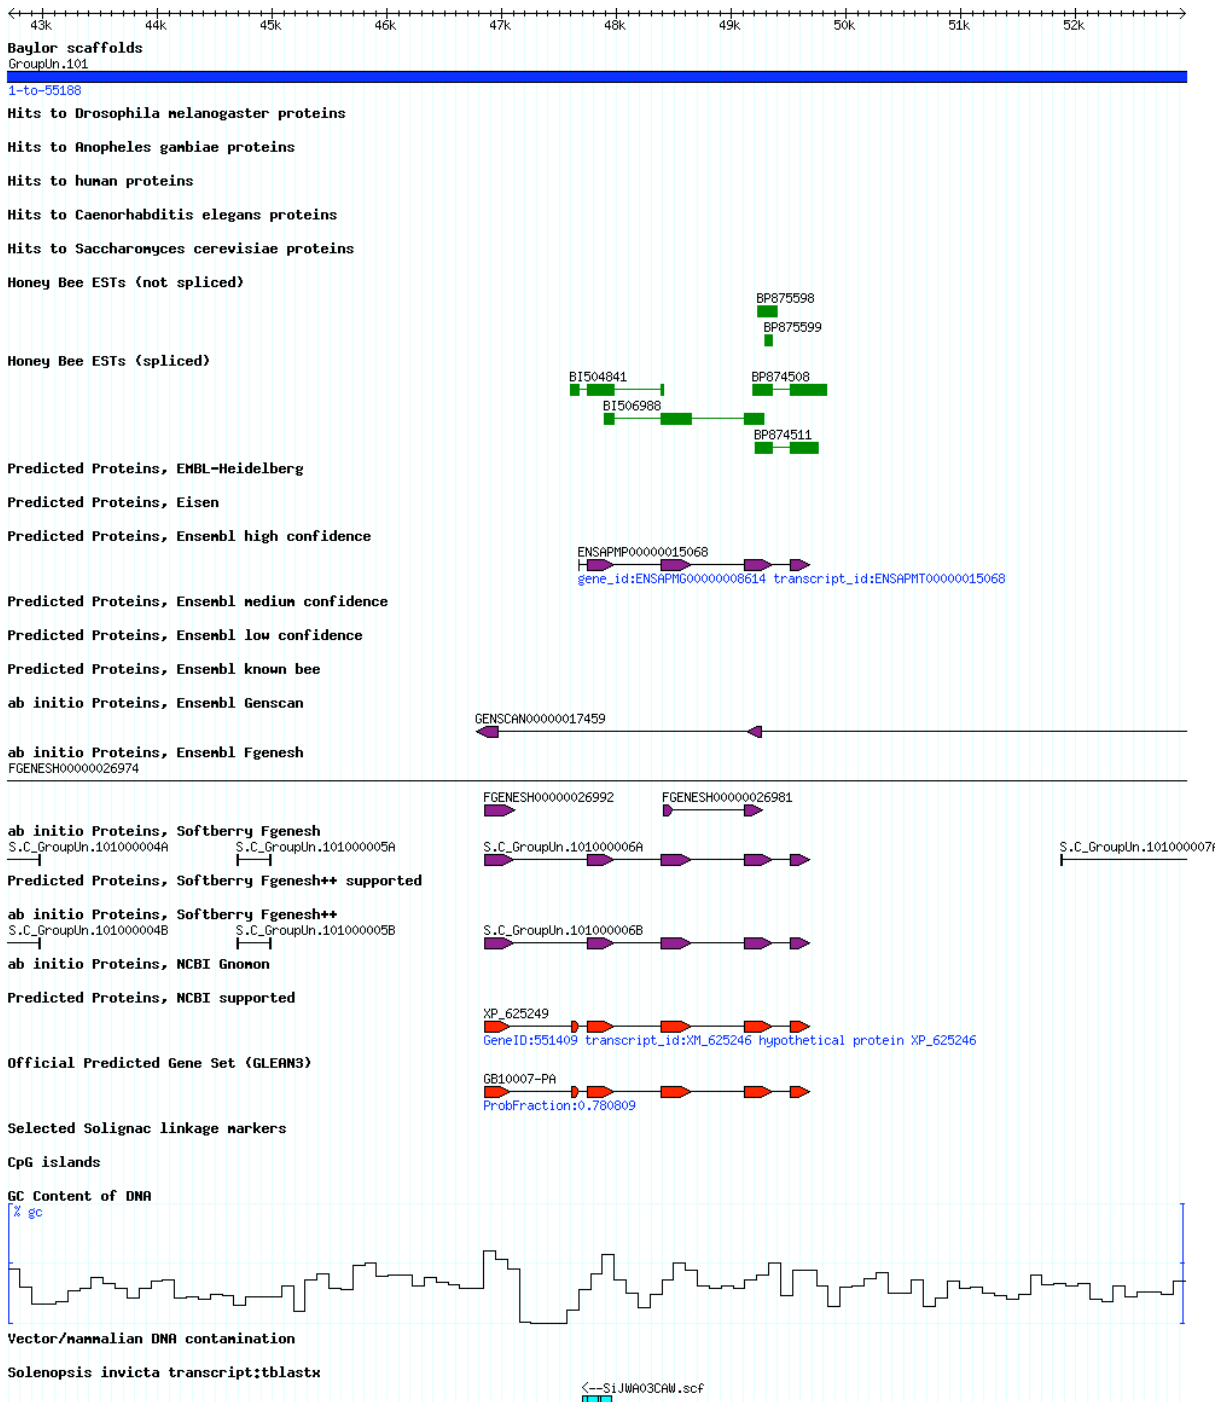

# c.SiJWA12ACK.scf

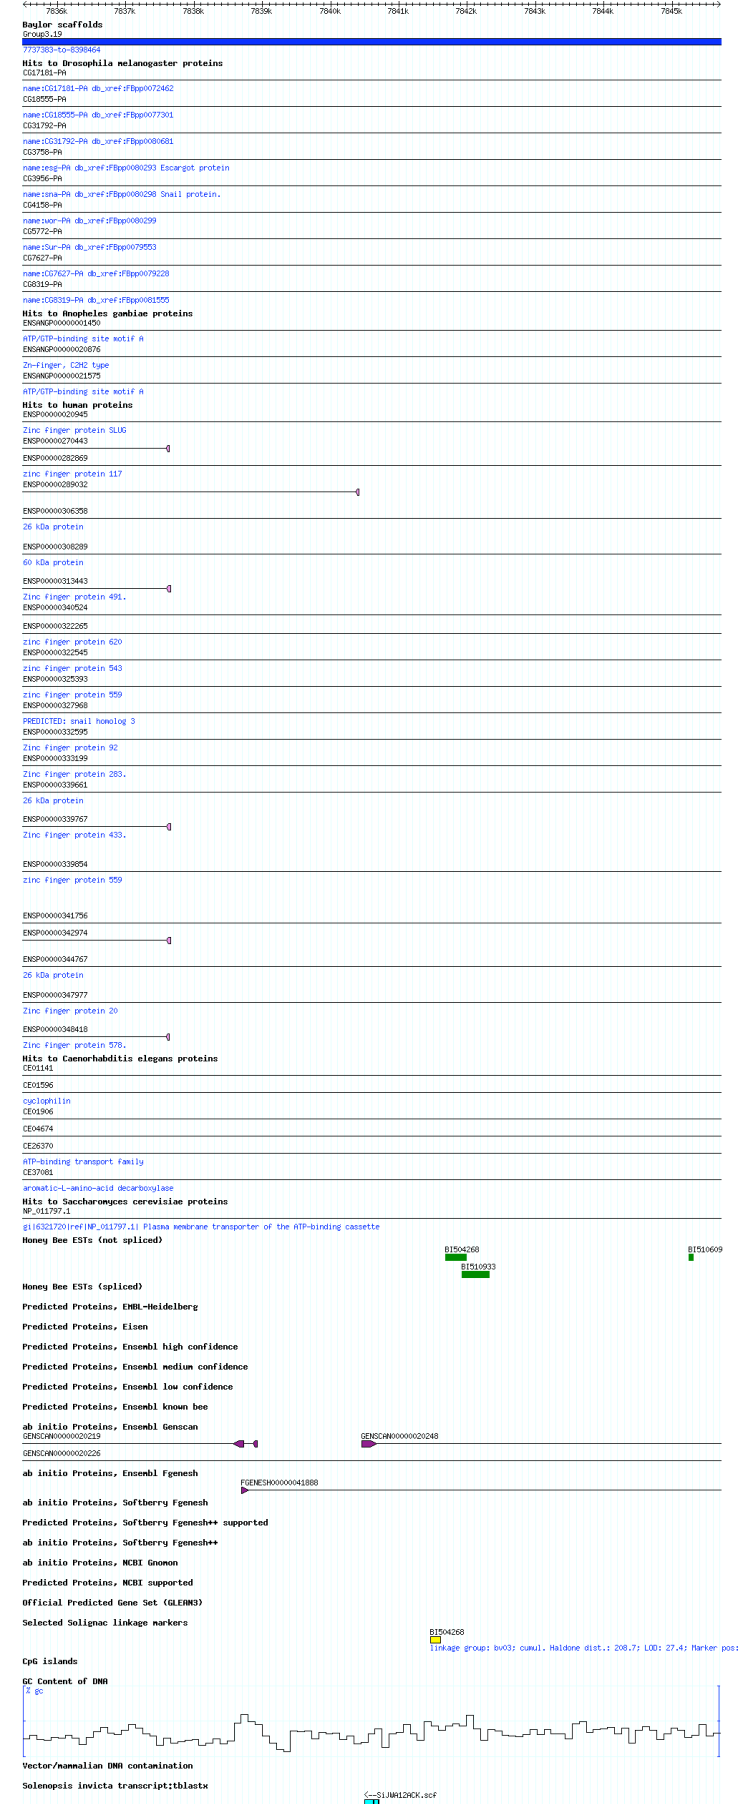

# d.SiJWB12BCQ.tag5\_B12\_04.scf

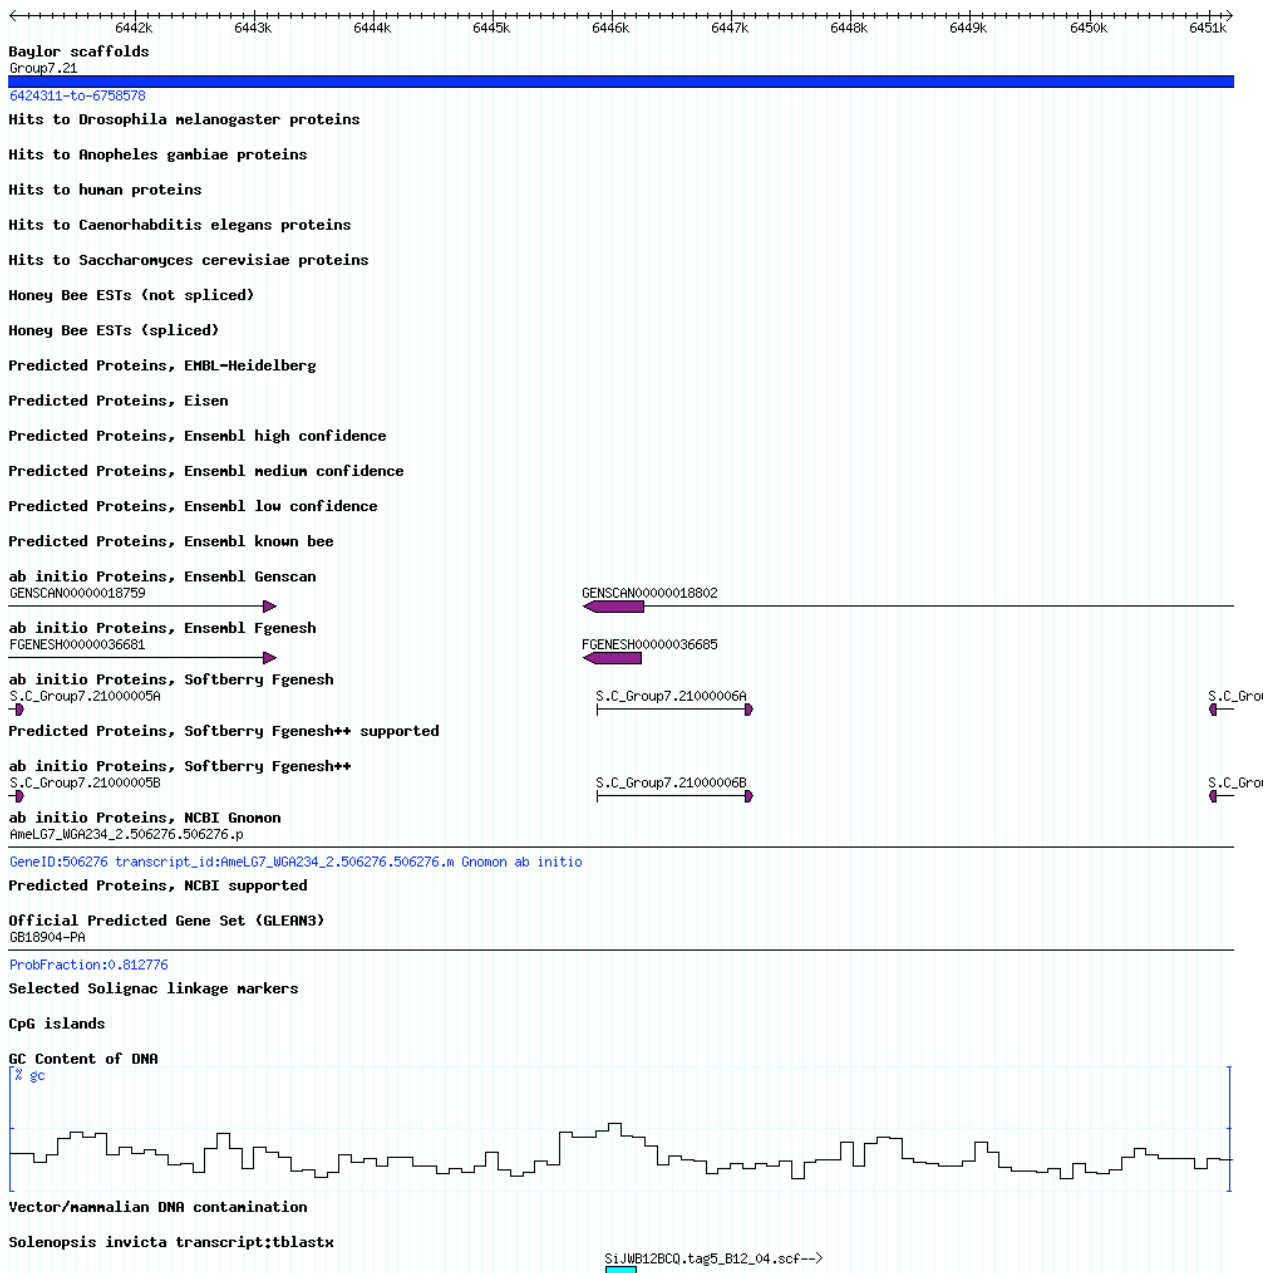

# e.SiJWC11BAT.scf

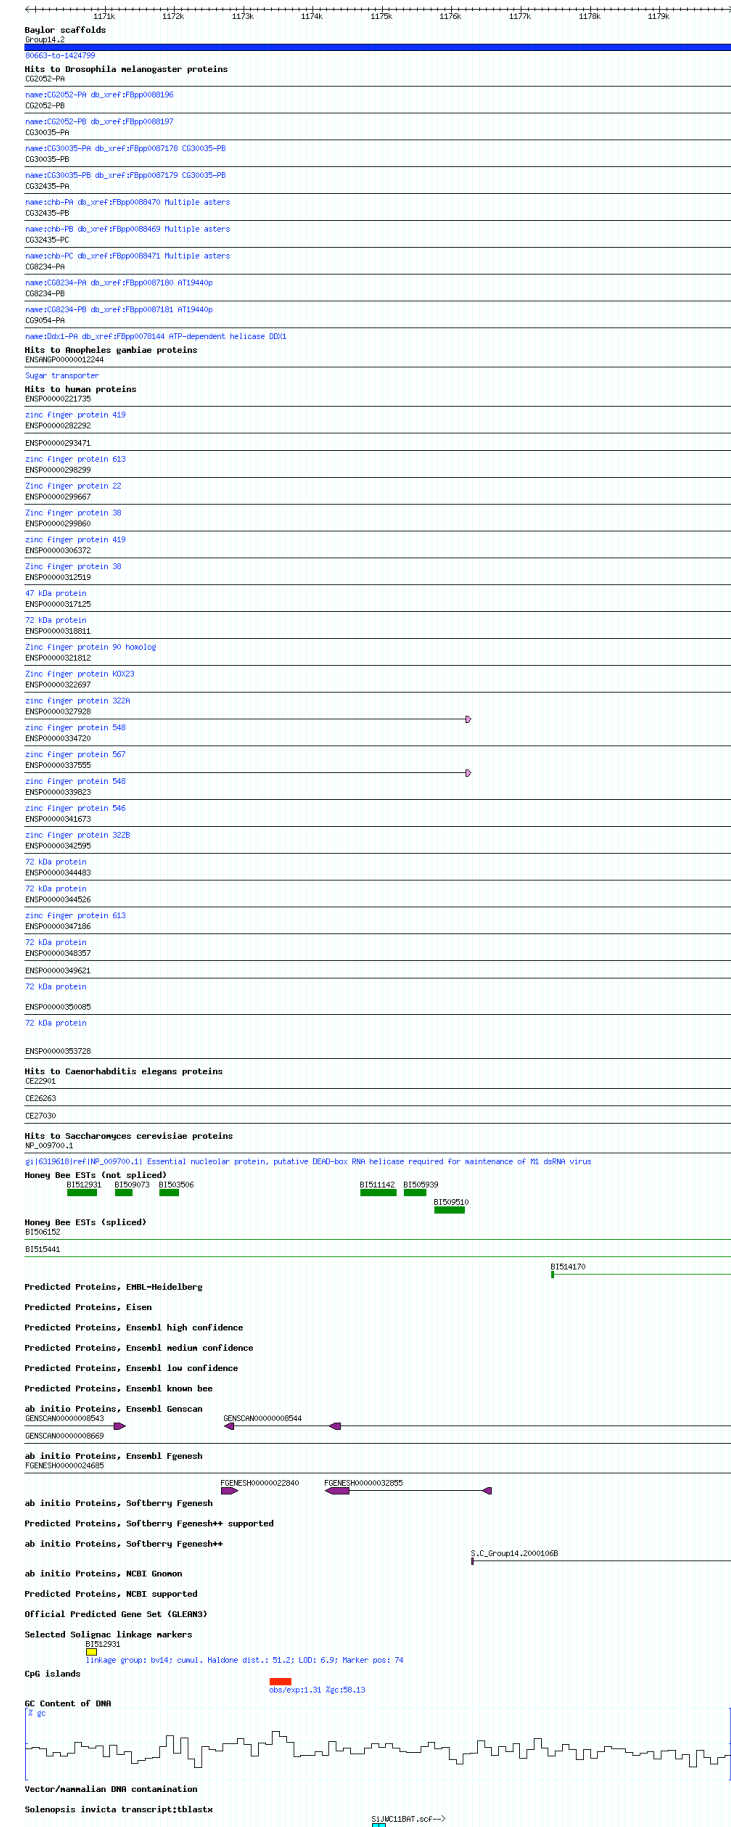

# f. SI.CL.8.cl.881.Contig1

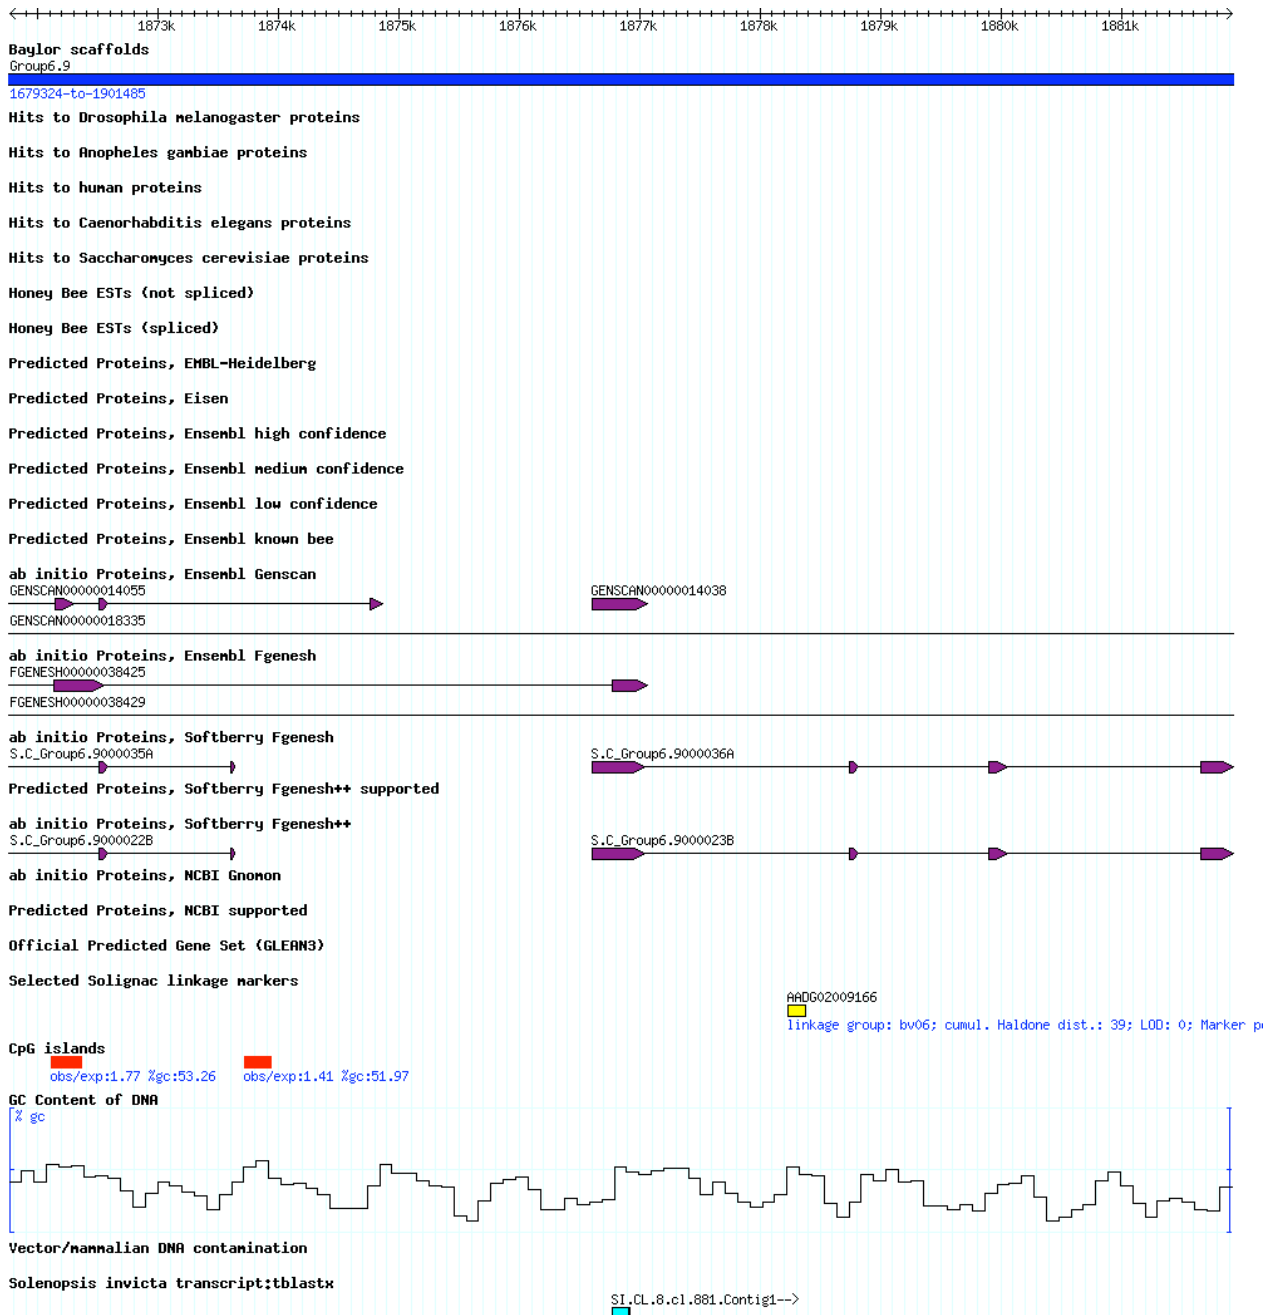





# h. SI.CL.19.cl.1938.Contig1

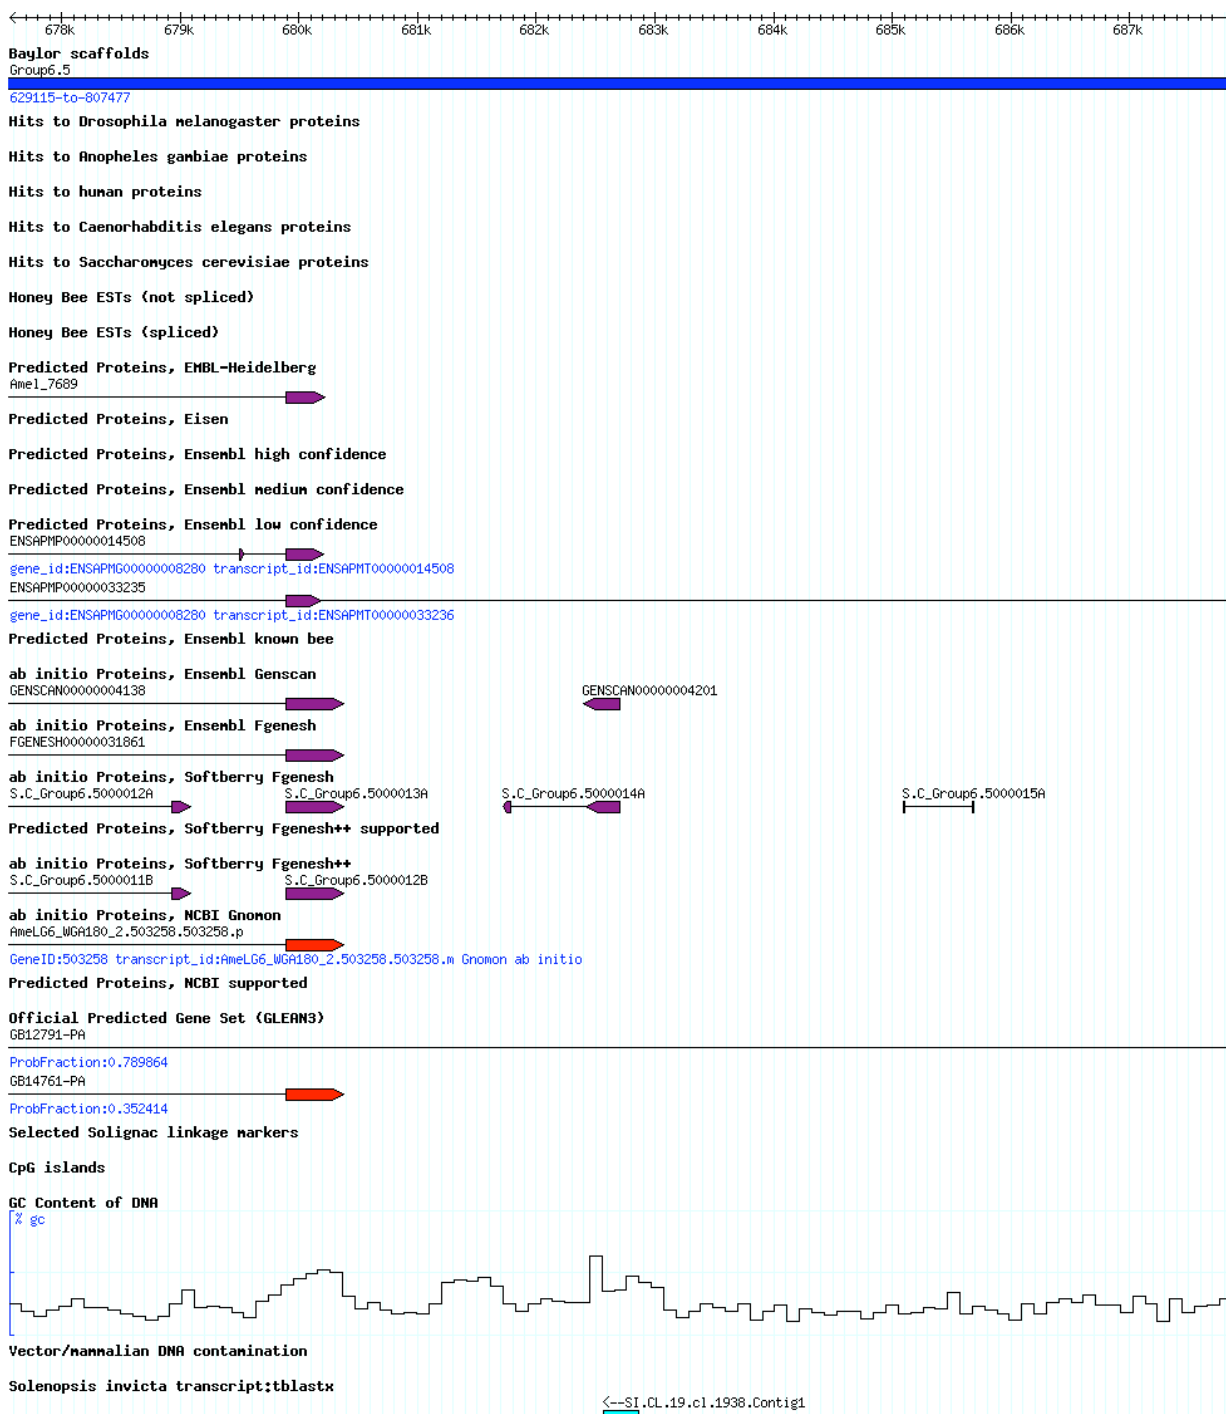

# i.SI.CL.19.cl.1953.SiJWC11BBX.scf

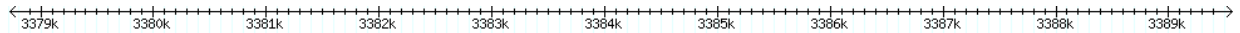

## Baylor scaffolds

Group8.14

3242228-to-4259416

### Hits to *Drosophila melanogaster* proteins

CG10068-PA  
name:CG10068-PA db\_xref:FBpp

### Hits to *Anopheles gambiae* proteins

ENSANGP00000011527  
Protein of unknown function

### Hits to human proteins

ENSP00000265840  
ELMO domain containing 1  
ENSP00000326342  
ELMO domain containing

### Hits to *Caenorhabditis elegans* proteins

CE01041

Leucine-rich repeats

CE23886

### Hits to *Saccharomyces cerevisiae* proteins

#### Honey Bee ESTs (not spliced)

B1515351

#### Honey Bee ESTs (spliced)

B1512402

#### Predicted Proteins, EMBL-Heidelberg

Ame1\_8646

Ame1\_8647

Ame1\_8648

#### Predicted Proteins, Eisen

#### Predicted Proteins, Ensembl high confidence

ENSAPMP00000020198

gene\_id:ENSAPMG00000014031 transcript\_id:ENSAPMT00000020193

ENSAPMP00000025292

gene\_id:ENSAPMG00000011026 tra

ENSAPMP00000020883

gene\_id:ENSAPMG00000011026 t

ENSAPMP00000019730

gene\_id:ENSAPMG0000001102

#### Predicted Proteins, Ensembl medium confidence

#### Predicted Proteins, Ensembl low confidence

#### Predicted Proteins, Ensembl known bee

#### ab initio Proteins, Ensembl Genscan

GENSCAN00000000647

GENSCAN00000014270

GENSCAN00000014269

#### ab initio Proteins, Ensembl Fgenesh

FGENESH00000027869

FGENESH00000036405

FGENESH00000040570

FGENESH00000040610

FGENESH00000040639

#### ab initio Proteins, Softberry Fgenesh

S.C\_Group8.14000018A

S.C\_Group8.14000019A

S.C\_Group8.14000020A

S.C\_Group8.14000021A

#### Predicted Proteins, Softberry Fgenesh++ supported

S.C\_Group8.14000007B

S.C\_Group8.14000008B

S.C\_Group8.14000009B

#### ab initio Proteins, NCBI Gnonon

#### Predicted Proteins, NCBI supported

XP\_394726

XP\_624380

GeneID:411253 transcript\_id:XM\_394726 similar to ENSANGP00000015204

GeneID:551995 transcript\_id:

XP\_397571

GeneID:409562 transcript\_id:XM\_397571 similar to hypothetical protein

#### Official Predicted Gene Set (GLERN3)

GB19925-PA

GB14543-PA

GB14887-PA

ProbFraction:0.781819

ProbFraction:0.433441

ProbFraction:0.999993

#### Selected Solignac linkage markers

#### CpG islands

#### GC Content of DNA

% gc

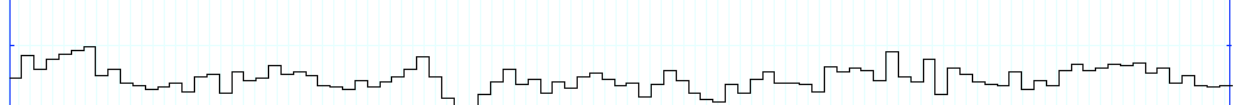

#### Vector/mammalian DNA contamination

#### Solenopsis invicta transcript:tblastx

<--SI.CL.19.cl.1953.SiJWC11BBX.scf

# j. SI.CL.23.cl.2326.Contig1

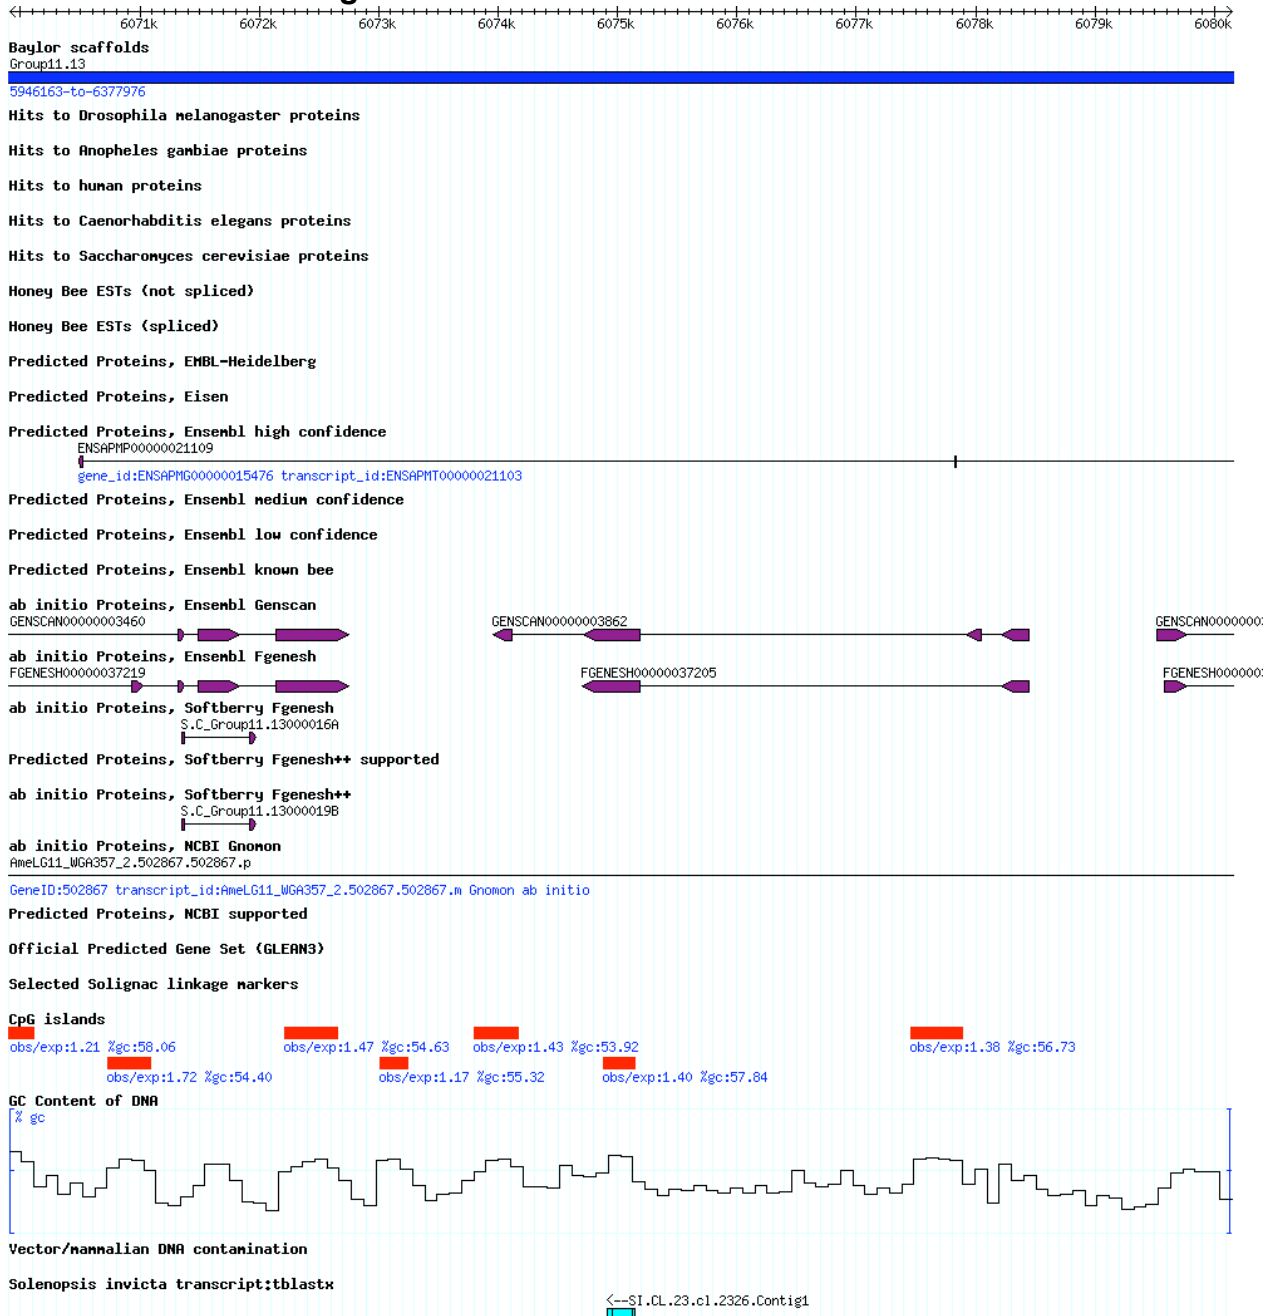

# k. SI.CL.26.cl.2688.Contig1

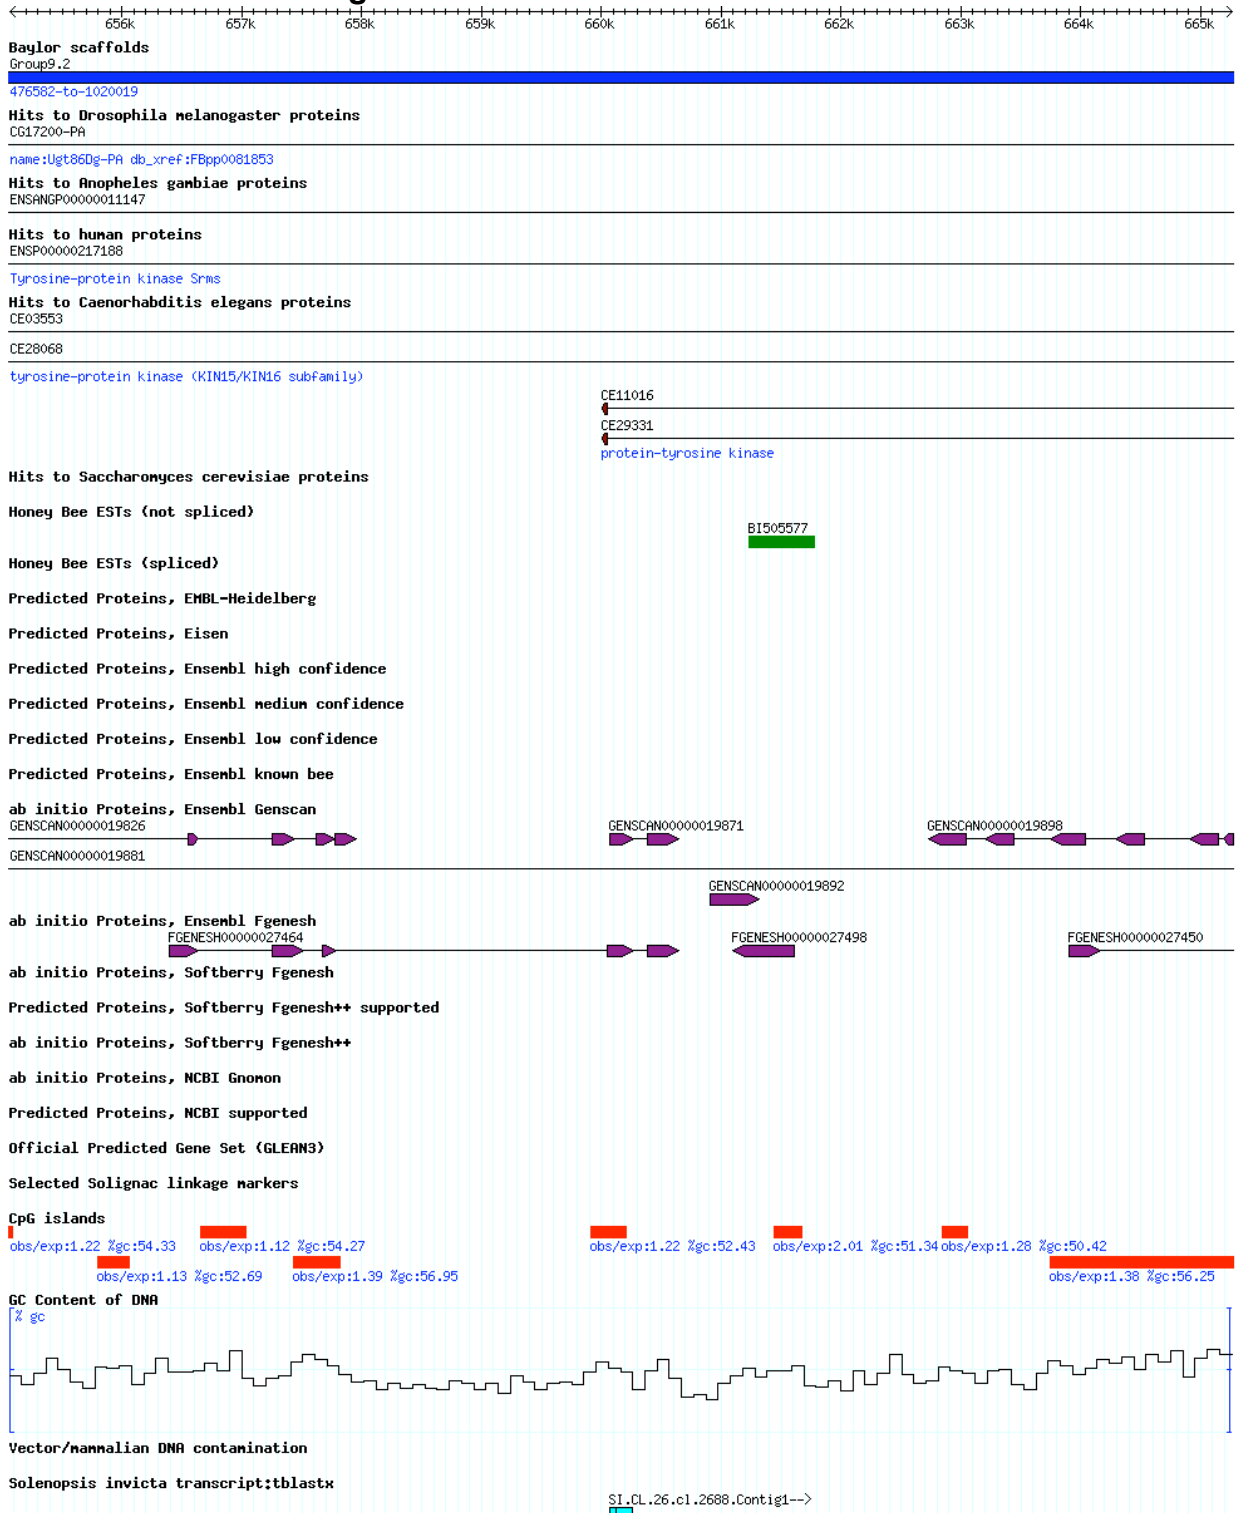





# n. SI.CL.35.cl.3595.Contig1

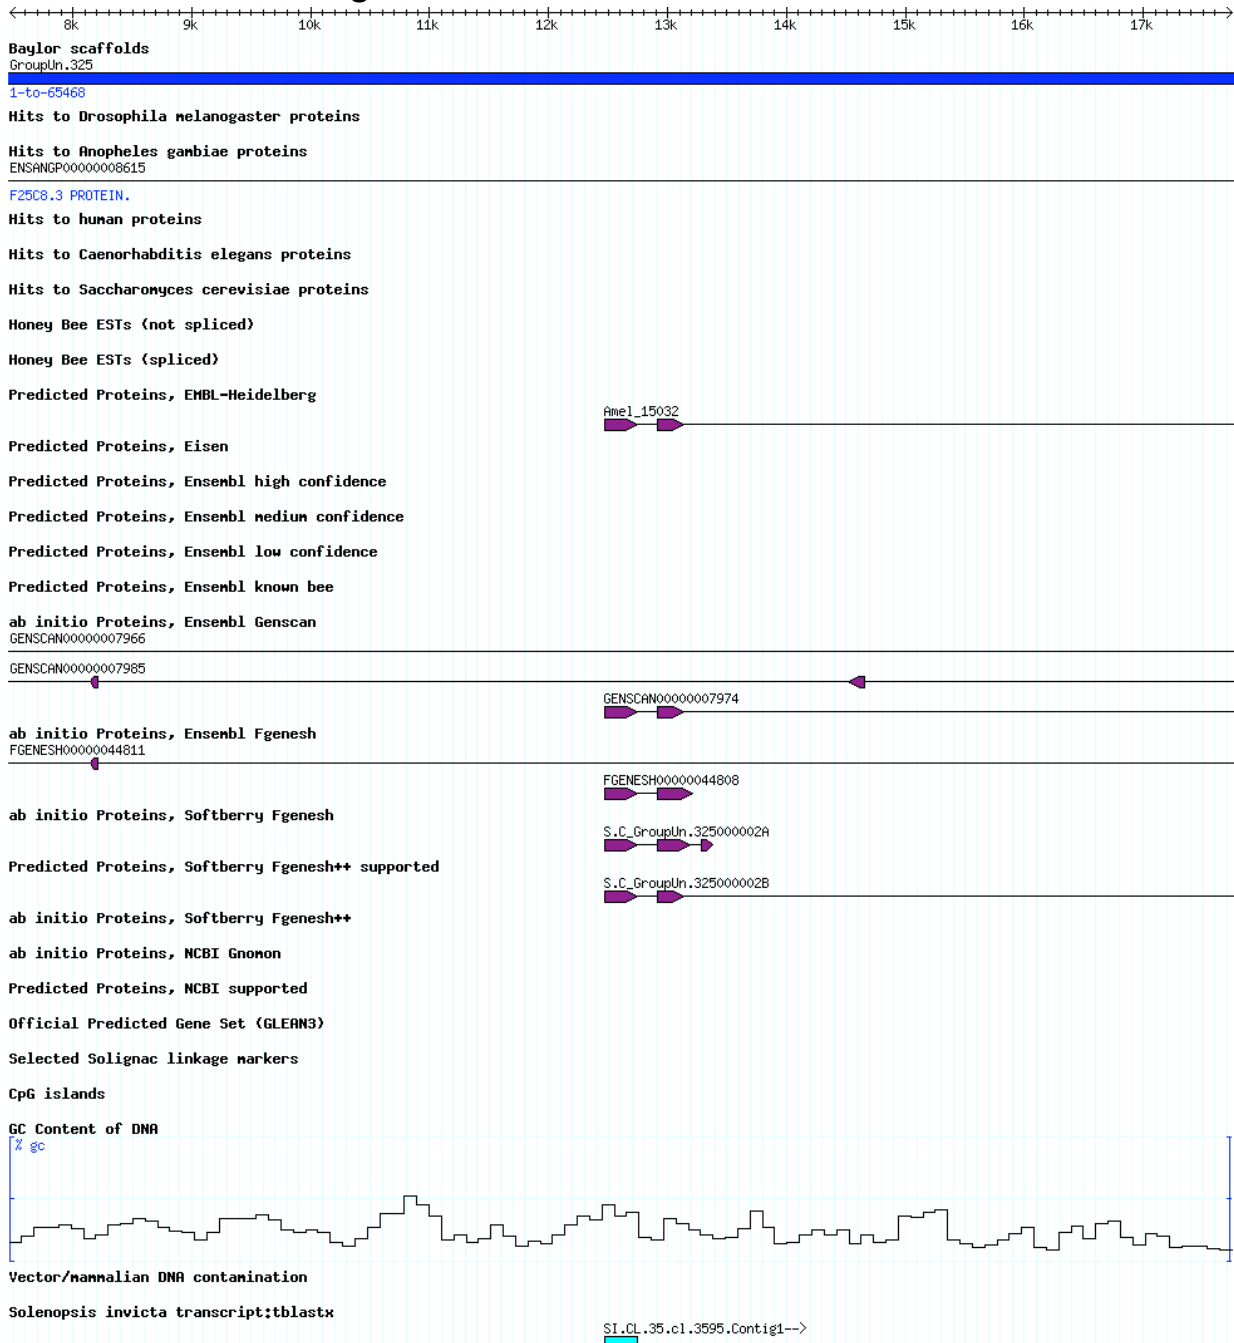

# o.SiJWE02BBO2.scf

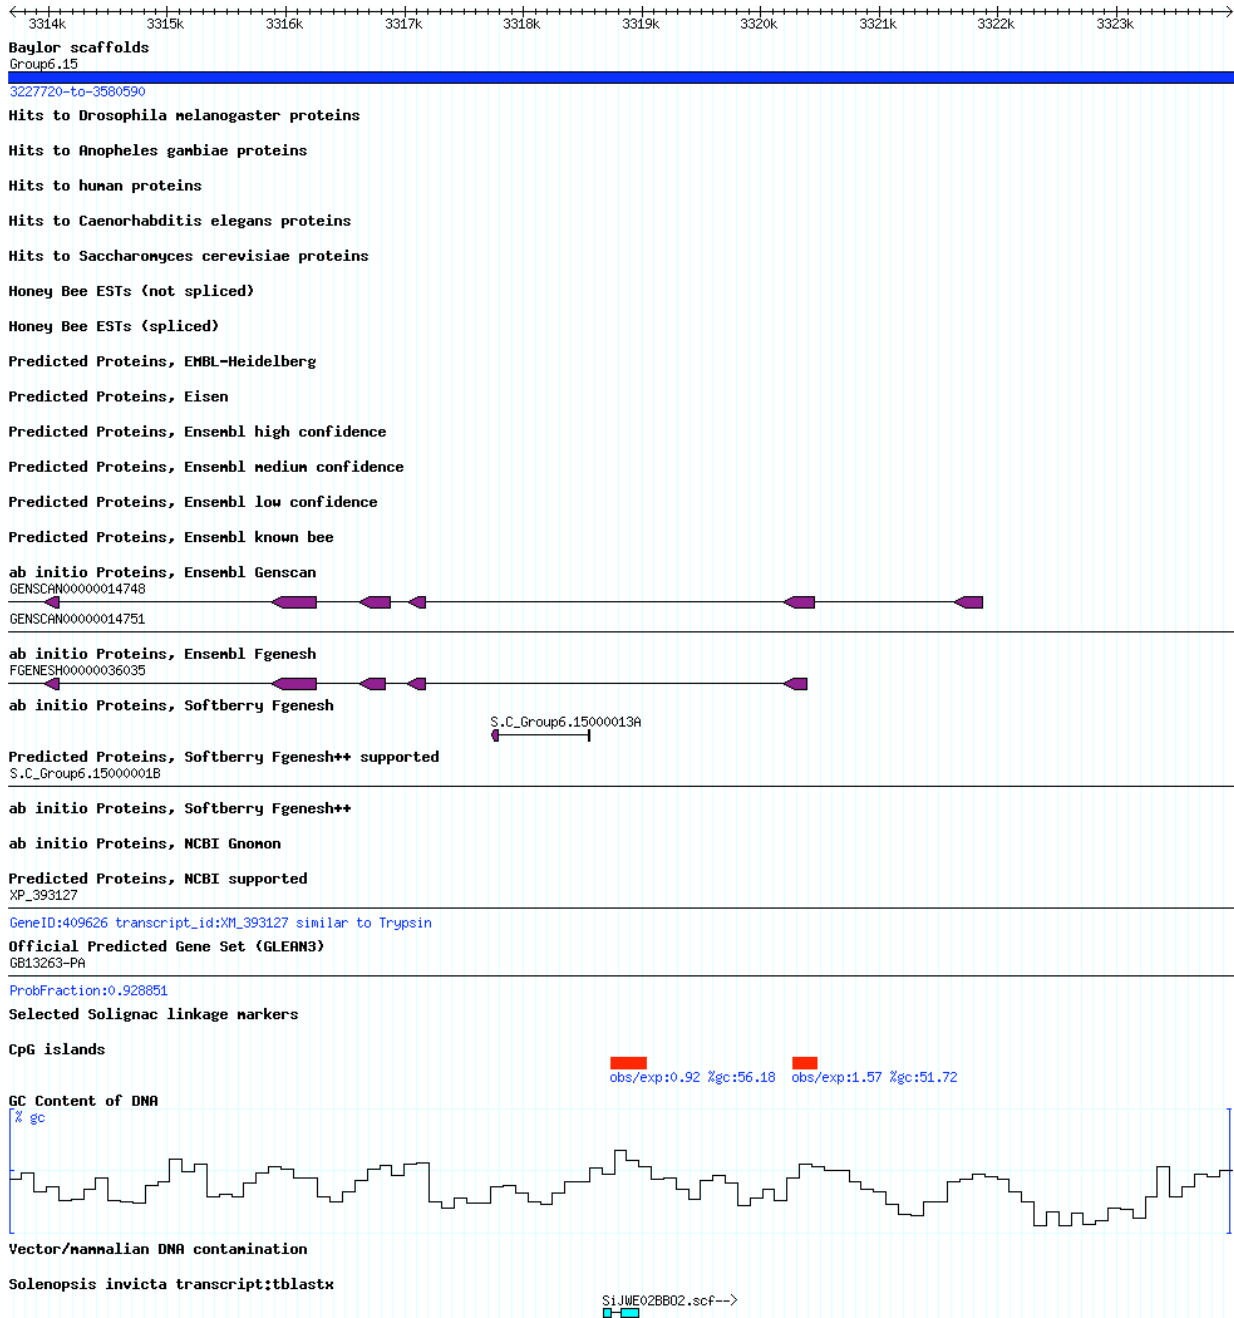



p. SiJWF07BCC.tag5\_F07\_11.scf

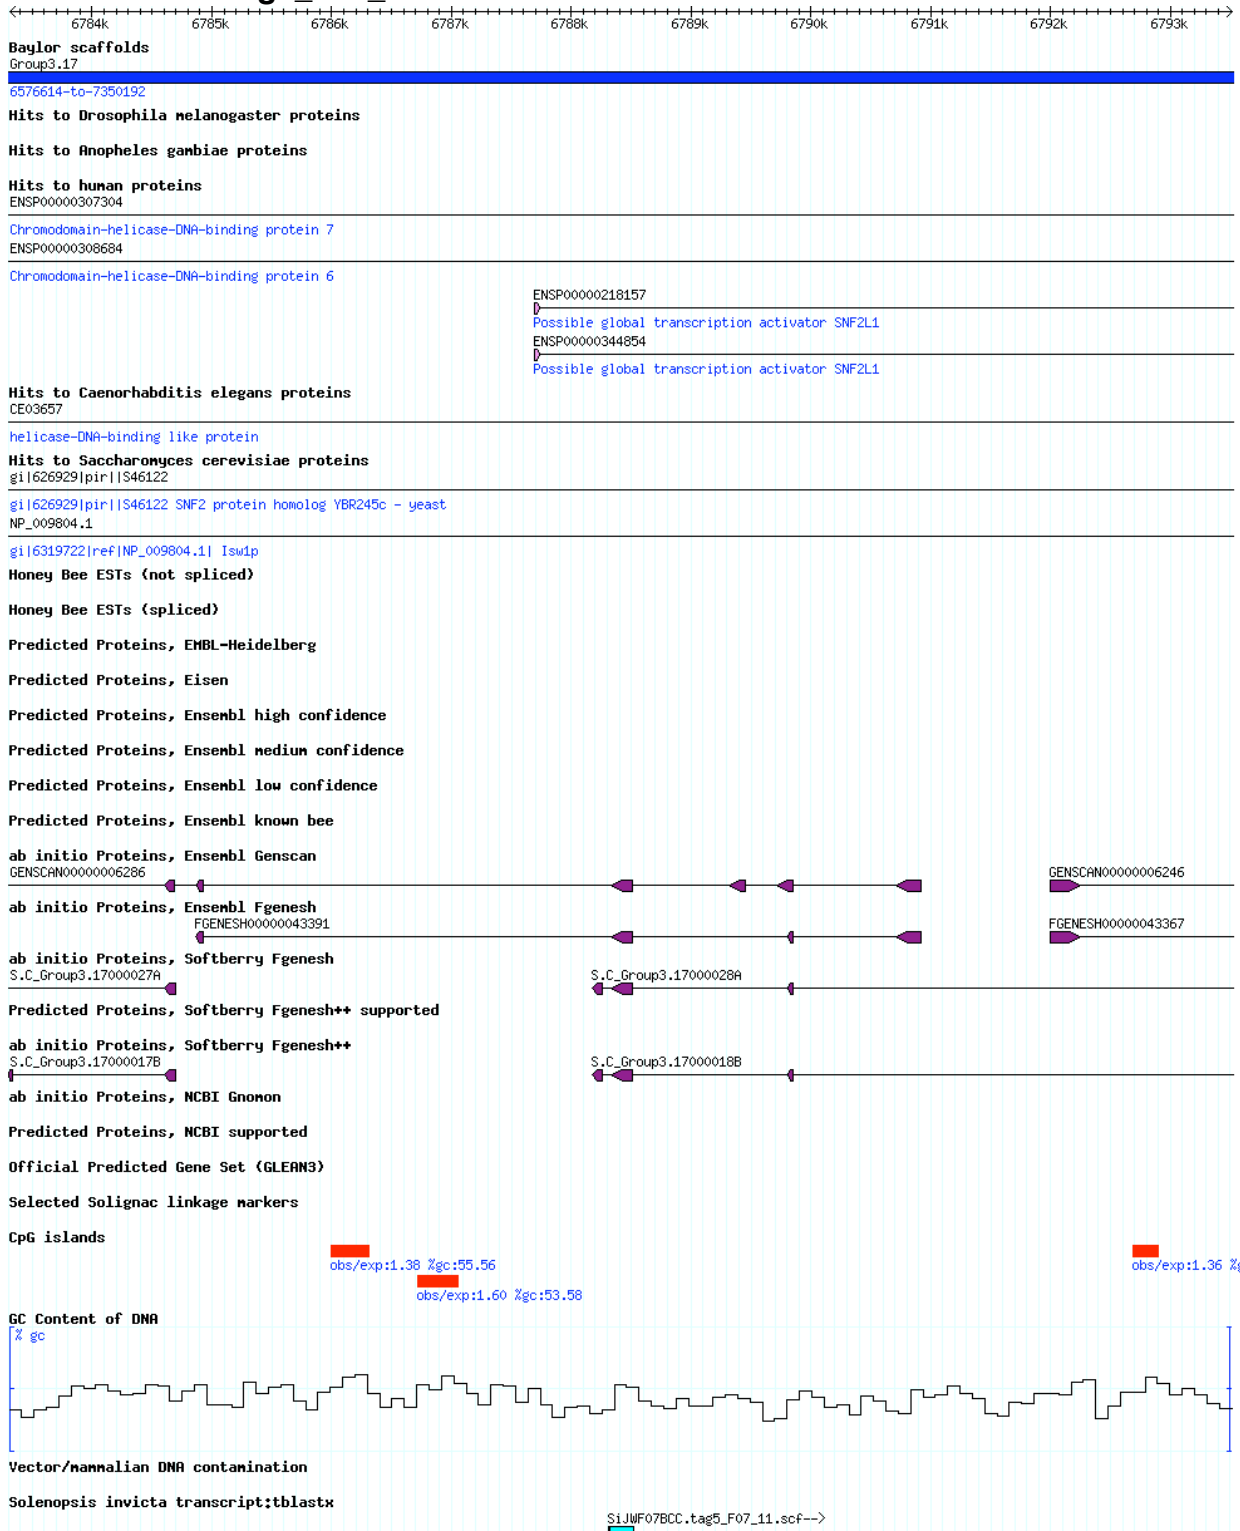



# r. SiJWG03ACB.scf

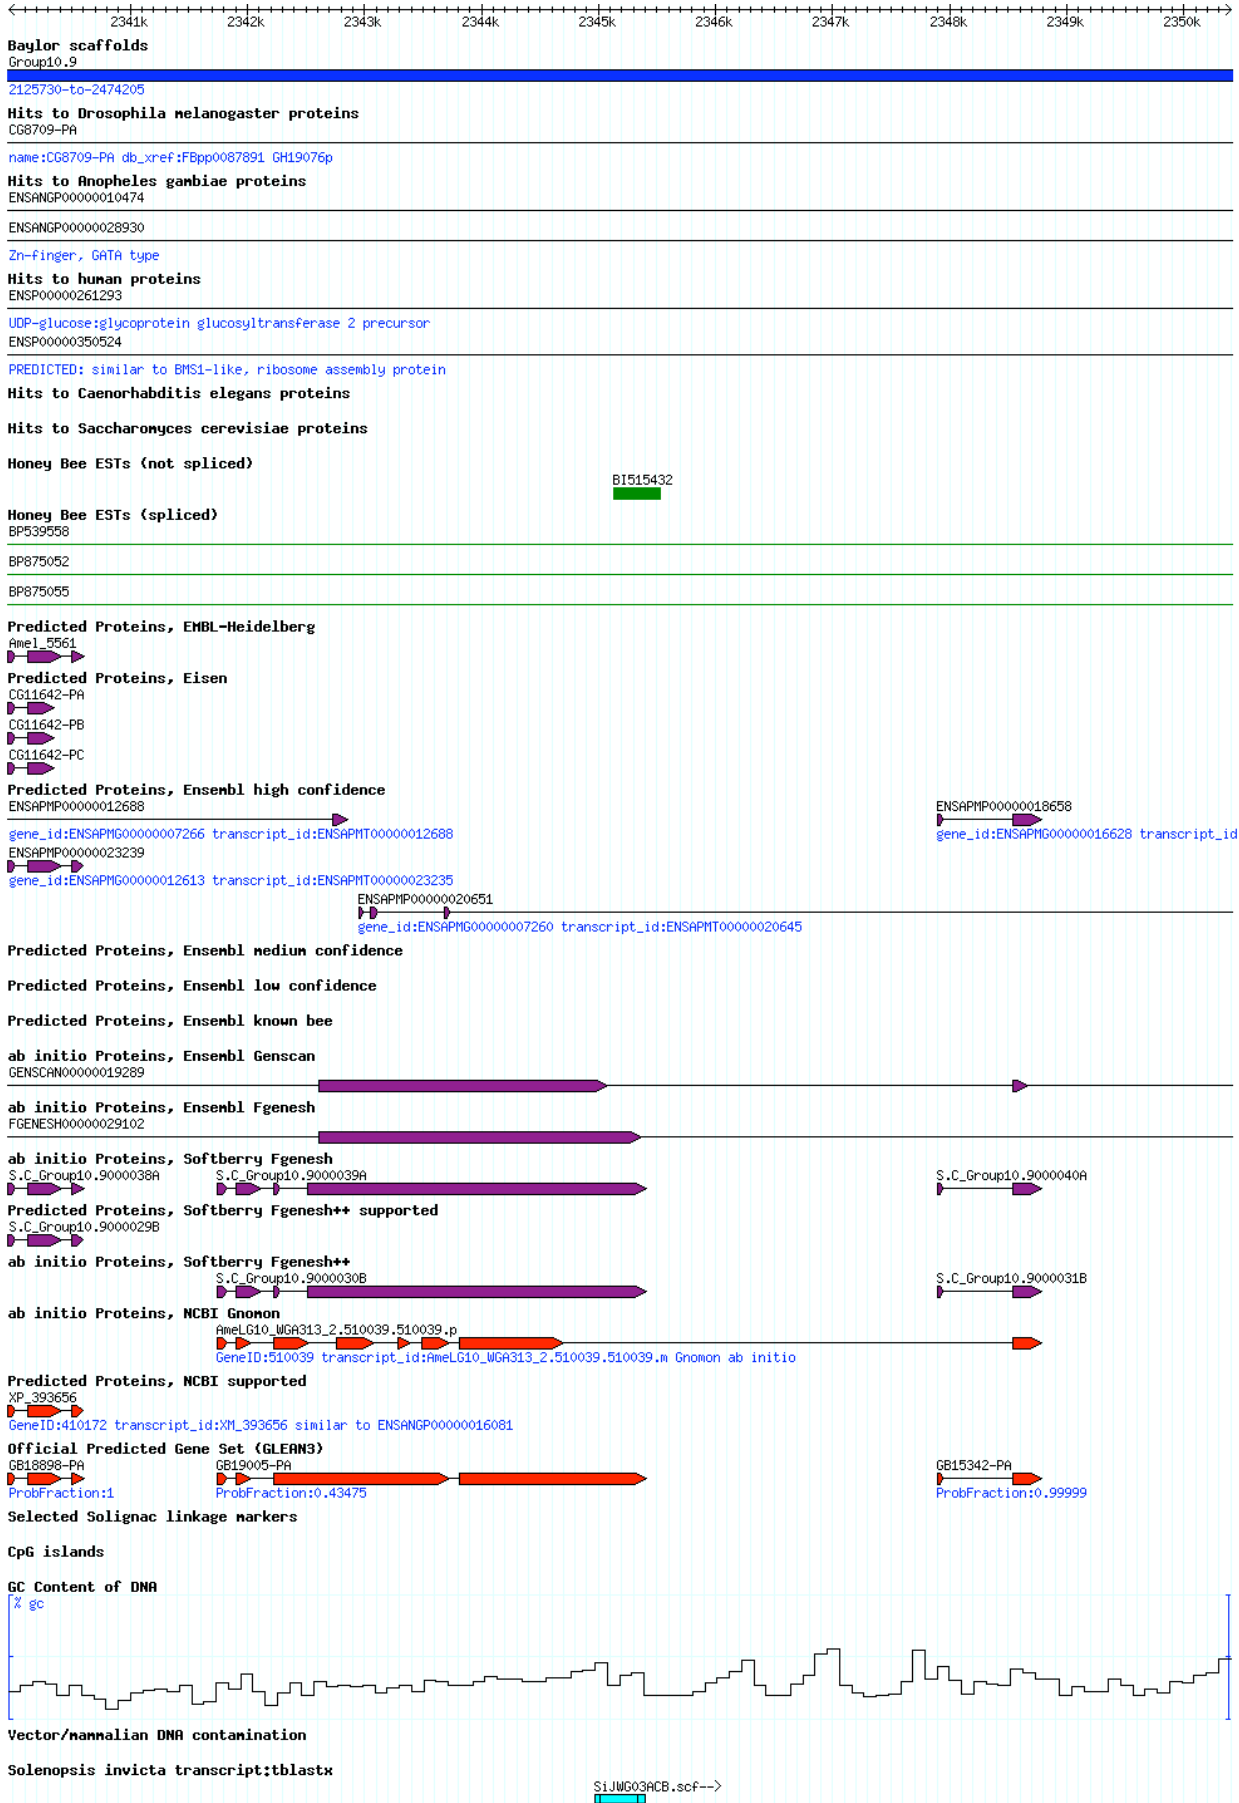

# s. SiJWH02AAN.scf

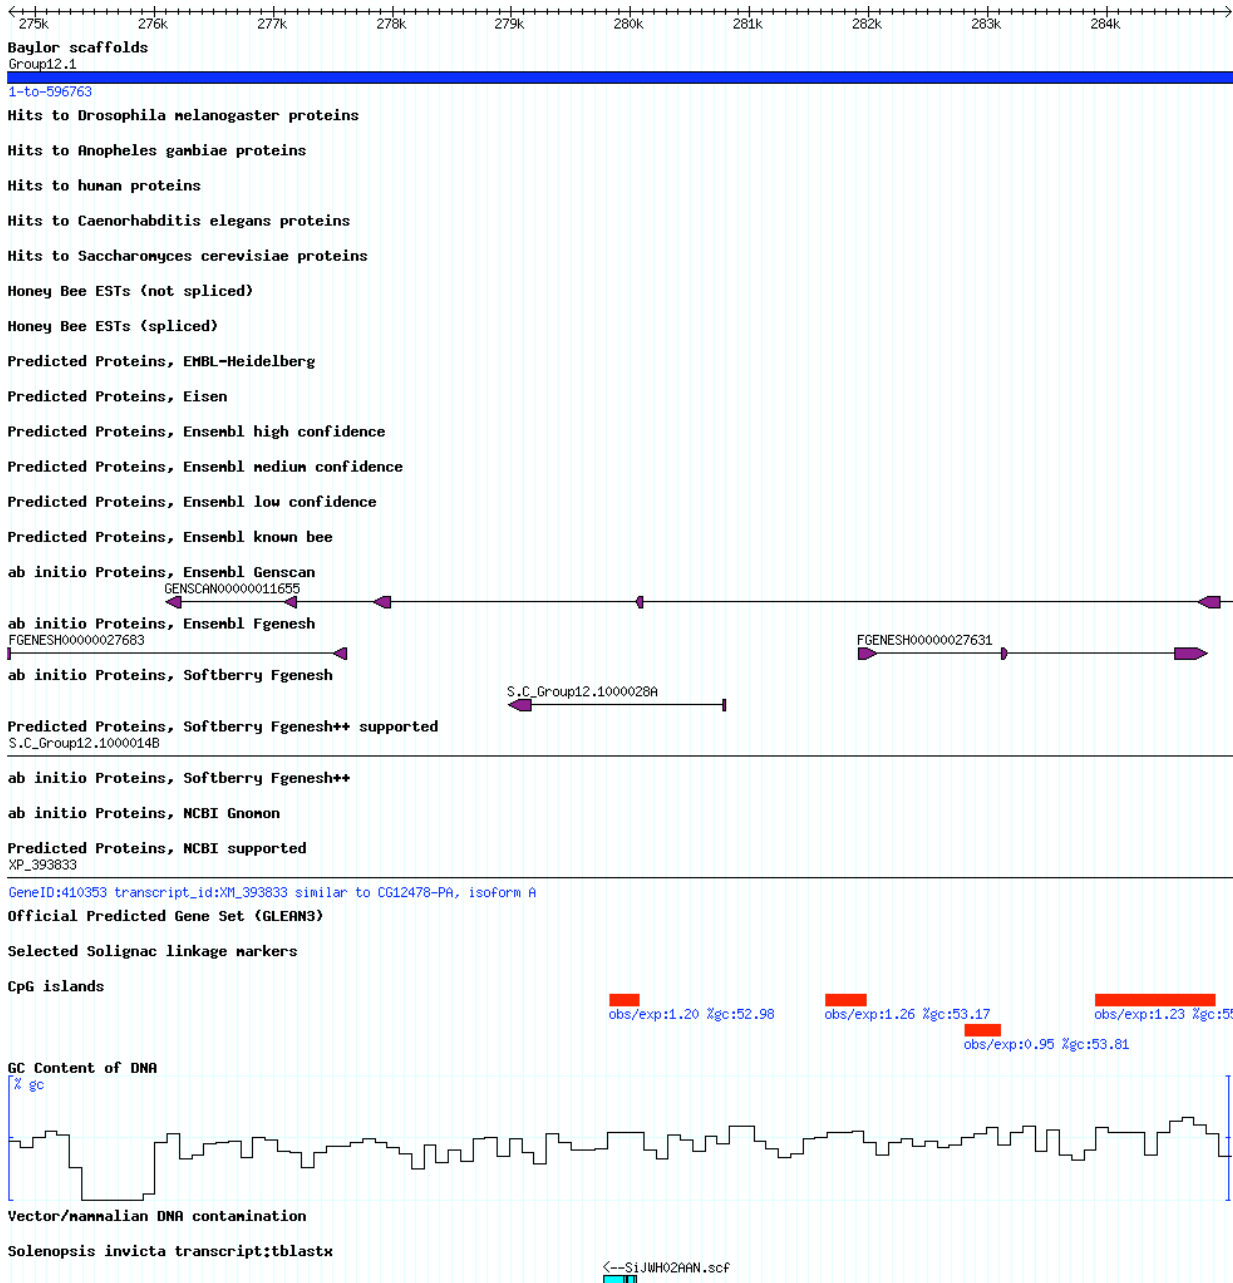

# t. SiJWH05BDPR5A08.scf

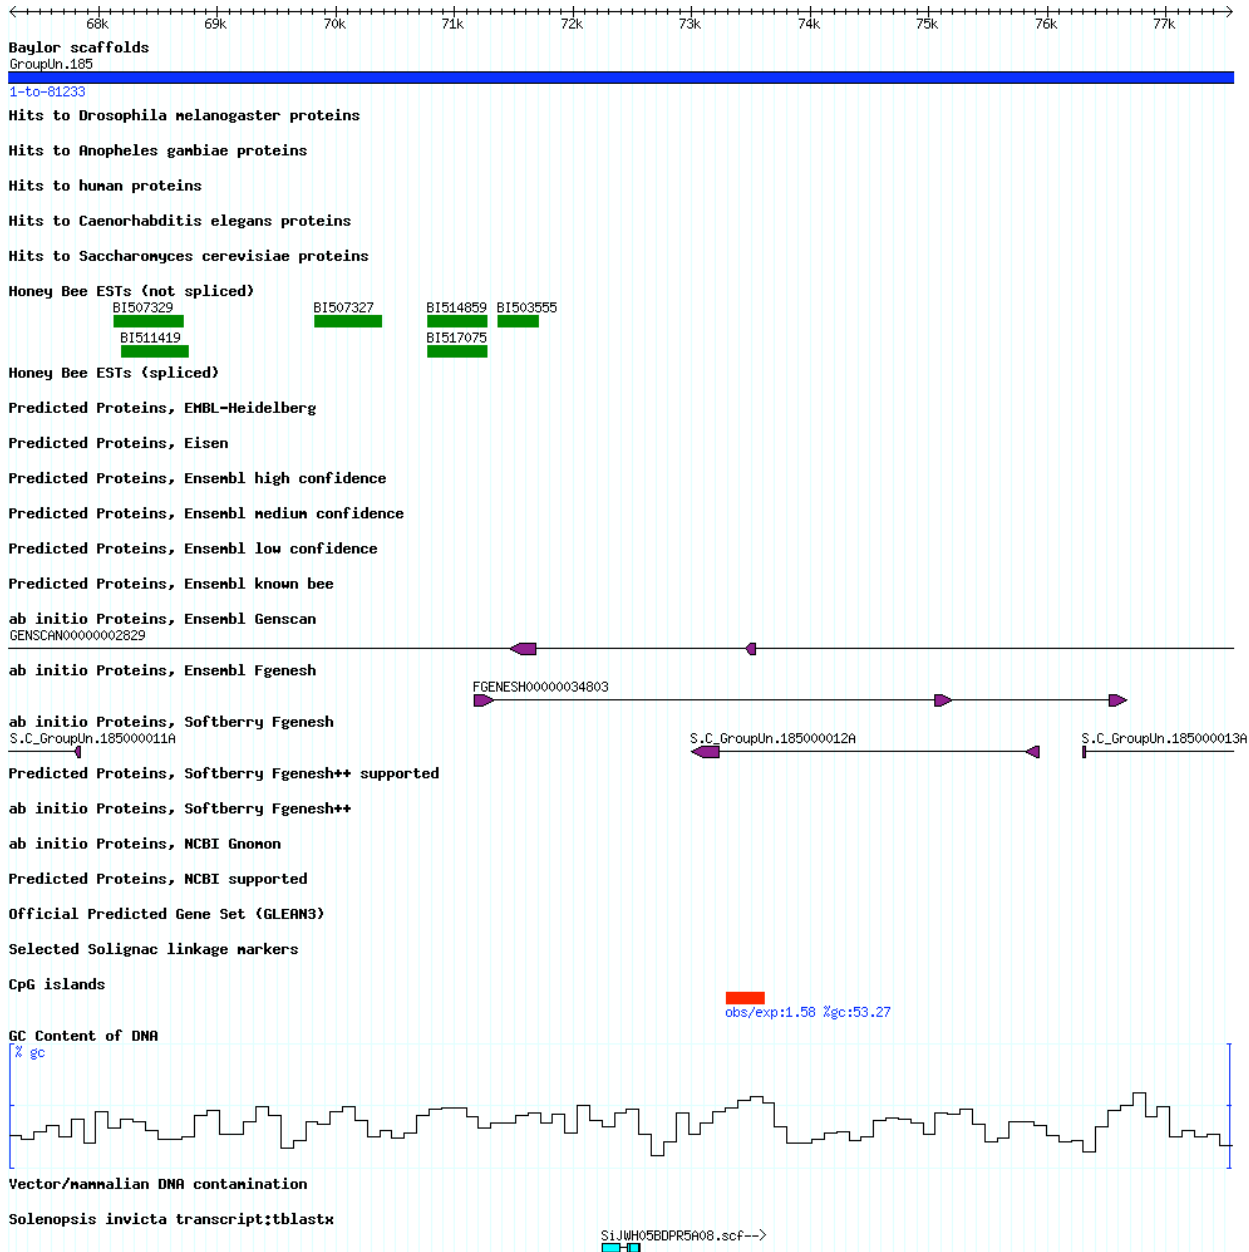

## u. SiJWH05BDV2.scf

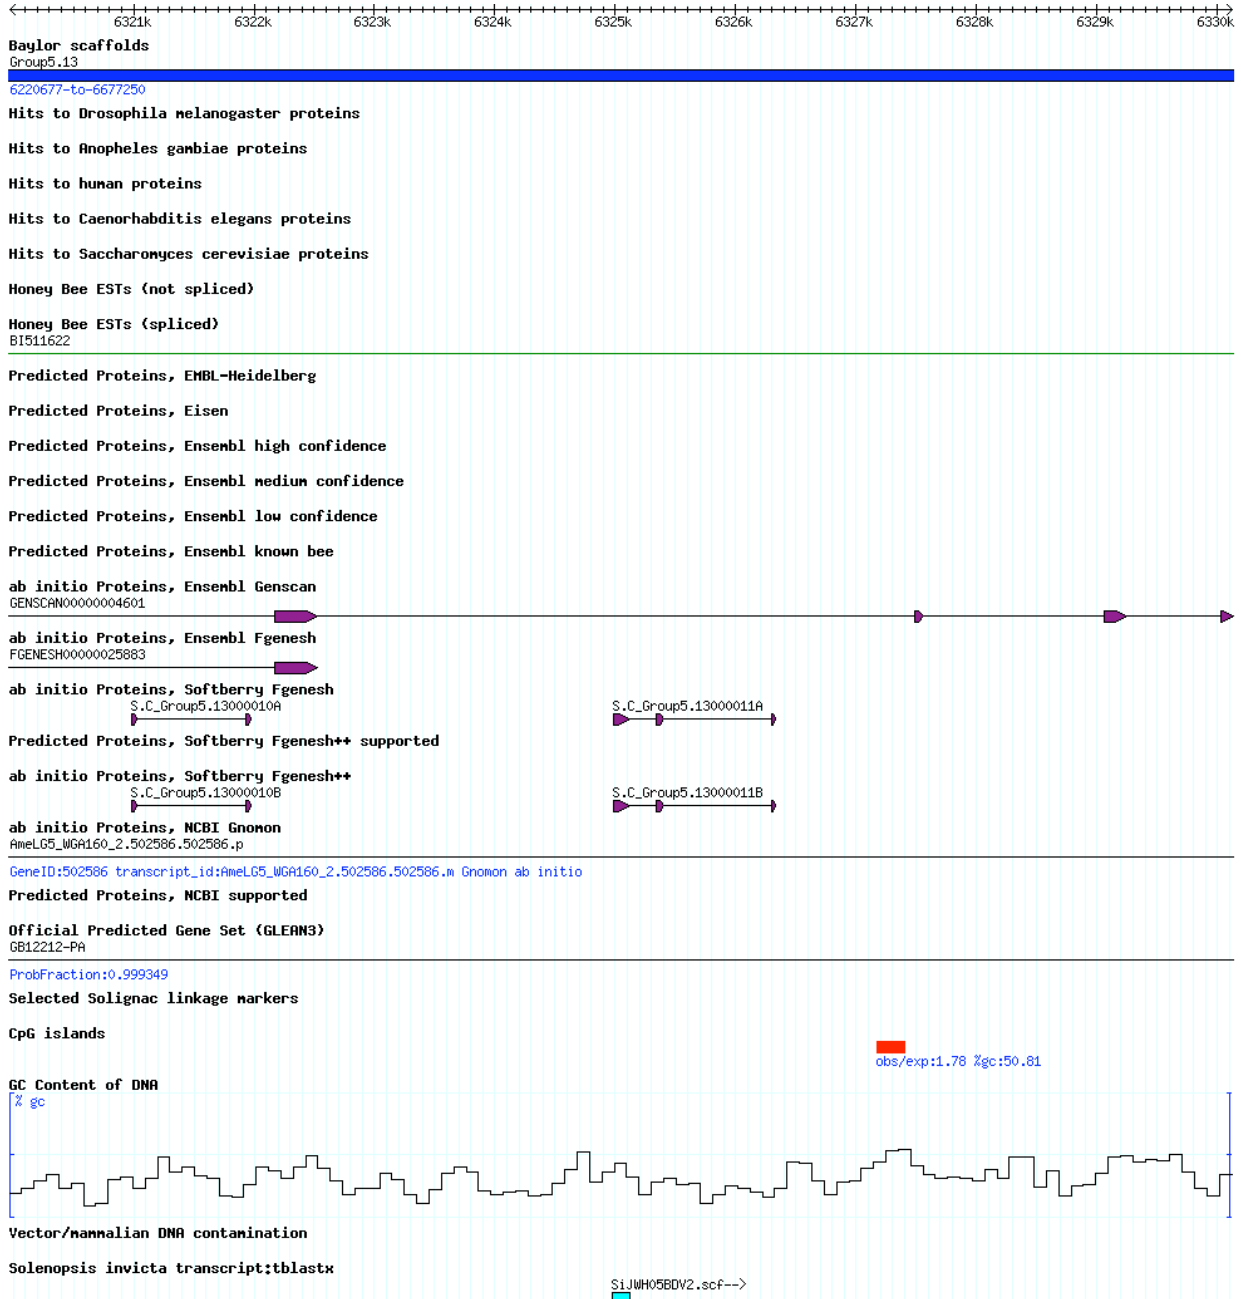



# w.SiJWH08ADY

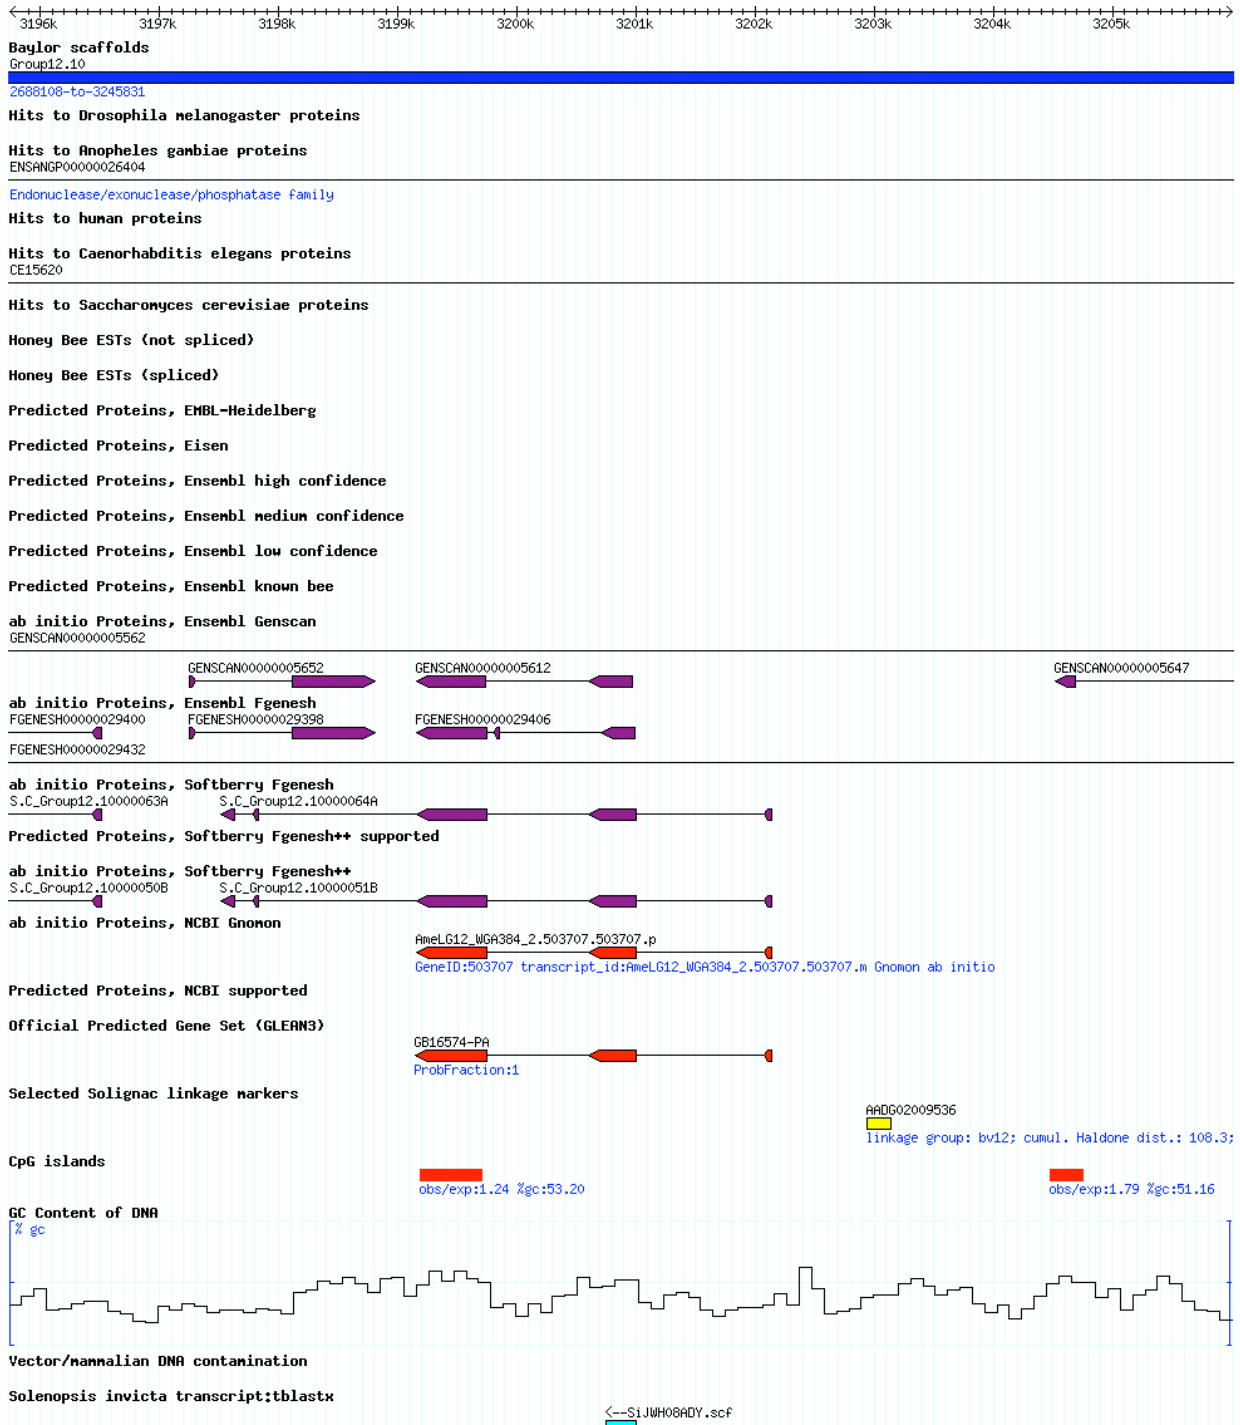

Supplement: MOESM5 [file 13059_2006_1491_MOESM5_ESM.pdf]
